# Supplementary material for: Cobalt doped BiVO4 with rich oxygen vacancies for efficient photoelectrochemical water oxidation
Source: Royal Society of Chemistry journal article supplement (doi:10.1039/d0ra01961e), 2020-01-01
Supplement: d0ra01961e1.pdf [file d0ra01961e1.pdf]

**+Supporting Information**

**Cobalt doped BiVO<sub>4</sub> with rich oxygen vacancies for efficient  
photoelectrochemical water oxidation**

Guoquan Liu,<sup>a</sup> Fei Li,<sup>\*a</sup> Yong Zhu,<sup>a</sup> Jiayuan Li<sup>a</sup> and Licheng Sun<sup>ab</sup>

<sup>a</sup>State Key Laboratory of Fine Chemicals, DUT–KTH Joint Education and Research Center on Molecular Devices, Dalian University of Technology, Dalian 116024, R. P. China.

<sup>b</sup>Department of Chemistry, School of Engineering Sciences in Chemistry, Biotechnology and Health, KTH Royal Institute of Technology, Stockholm 10044, Sweden.

\*Corresponding Author, E-mail: lifei@dlut.edu.cn

## Experiment section

### Chemical reagents and Instruments

Bismuth nitrate pentahydrate ( $\text{Bi}(\text{NO}_3)_3 \cdot 5\text{H}_2\text{O}$ ,  $\geq 98.0\%$ ), Vanadium(IV)oxy Acetylacetonate ( $\text{VO}(\text{acac})_2$ , 98%), were purchased from Aladdin. p-Benzoquinone ( $\geq 98.0\%$ ) and Cobaltous chloride ( $\text{CoCl}_2$ , 99.5%) was supplied by Sinopharm Chemical Reagent Co., Ltd. Potassium iodide ( $\text{KI}$ ,  $\geq 98.5\%$ ) was purchased from Tianjin Guangfu Development Co., LTD. High purity water ( $18.2 \text{ M}\Omega/\text{cm}$ ) supplied by a Milli-Q system (Millipore, Direct-Q 3 UV) was used in all experiments. FTO substrates were purchased from Dalian Heptachroma SolarTech Co., Ltd. (thickness of  $\sim 2.2 \text{ mm}$ , transmittance of  $> 90\%$ , resistance  $< 15 \Omega/\text{cm}^2$ ). Before using, the FTO substrates were ultrasonically cleaned in deionized water, ethanol, and acetone, respectively. All other reagents were commercially available and used as received.

UV-vis diffuse reflectance spectrum (DRS) of the sample was measured using a Shimadzu UV-2000 spectrophotometer. Electrochemical measurements were taken with a CHI760E electrochemical potentiostat (Shanghai Chenhua, China). X-ray Diffraction (XRD) was collected with a SmartLab 9KW diffractometer using  $\text{Cu K}\alpha$  radiation (154.1 nm). Scanning electron microscopy (SEM) and energy dispersive X-ray (EDX) mapping of the electrodes were conducted with a Hitachi SU8220 instrument with an accelerating voltage of 5.0 kV. Transmission Electron Microscope (TEM) was carried out by Thermo Scientific TF30 instrument X-ray photoelectron

spectroscopy (XPS) measurement was performed on a Thermo ESCALAB XI+ instrument using 150 W K $\alpha$  radiate.

### **Preparation of BiVO<sub>4</sub> and Co-BiVO<sub>4</sub> photoanode**

BiVO<sub>4</sub> and Co-BiVO<sub>4</sub> films were prepared by electrodeposition.<sup>1</sup> First, the 2 mmol of Bi(NO<sub>3</sub>)<sub>3</sub> was dissolved in 50 mL of a pH 1.7 HNO<sub>3</sub> solution. After the mixture was stirred for 5 min, 20 mmol of KI was added to the solution at room temperature and the mixture was stirred for another 5 min. This solution was mixed with 20 mL of absolute ethanol containing 4.6 mmol of *p*-benzoquinone and was vigorously stirred for a few minutes. Then cobaltous chloride dissolved in the solution forms a (0, 2.5, 5, 7.5, 10, 12.5mg/ml ) Co<sup>2+</sup> precursor solution. A typical three-electrode cell containing a fluorine-doped tin oxide (FTO) working electrode, a saturated Ag/AgCl reference electrode, and a Pt wire counter electrode were used for electrodeposition. Electrodeposition was carried out at constant potential -0.1 V vs. Ag/AgCl for 3 min to obtain the BiOI and Co-BiOI electrode, which was rinsed with deionized water and dried in ambient air. The BiVO<sub>4</sub> and Co-doped BiVO<sub>4</sub> film were prepared by placing 30  $\mu$ L dimethyl sulfoxide (DMSO) solution containing 0.2 M vanadyl acetylacetonate (VO(acac)<sub>2</sub>) on the BiOI electrodes, followed by heating in a muffle furnace at 450 °C (ramping rate 2 °C/ min) for 2 h. After they cooled to room temperature, the electrodes were soaked in 1 M NaOH solution for 30 min to remove the excess V<sub>2</sub>O<sub>5</sub>. The obtained pure BiVO<sub>4</sub> , 2.5Co-BiVO<sub>4</sub>, 5Co-BiVO<sub>4</sub>, 7.5Co-BiVO<sub>4</sub>, 10Co-BiVO<sub>4</sub> and 12.5Co-BiVO<sub>4</sub> electrodes were rinsed with deionized water and dried in air.

## Electrochemical and photoelectrochemical Measurements

Photoelectrochemical and electrochemical performances of as-prepared anodes ( $\text{BiVO}_4$ ,  $\text{Co-BiVO}_4$ ) were collected in a standard three-electrode system, with the anodes as the working electrodes, a platinum wire as the counter electrode, and  $\text{Ag/AgCl}$  as the reference electrode controlled by a CHI 760E potentiostat. The simulated solar illumination was obtained by passing light from a 300 W xenon lamp equipped with an AM 1.5 filter, and the power intensity of the incident light was calibrated to  $100 \text{ mW/cm}^2$  using a THORLABS PM100D S121C photodetector. The 0.5 M sodium borate buffer solution (pH 9.3) was used as the electrolyte, which is obtained by dissolving 0.5 mol of  $\text{H}_3\text{BO}_3$  in 1L deionized water, followed by adding  $\text{NaOH}$  to adjust the pH to 9.3. The photocurrent was measured by linear sweep voltammetry with a scan rate of  $10 \text{ mV/s}$ . The recorded potential versus  $\text{Ag/AgCl}$  ( $E_{\text{Ag/AgCl}}$ ) was converted against RHE using the Nernst equation ( $E_{\text{RHE}} = E_{\text{Ag/AgCl}} + 0.197 + 0.059 \text{ pH}$ ). The data were collected by back illumination.

Electrochemical impedance spectroscopy (EIS) of the as-prepared film electrodes was measured at  $1.23 \text{ V}$  vs. RHE in a frequency range of  $0.1\text{-}100000 \text{ Hz}$  with an amplitude of  $5 \text{ mV}$  in  $0.5 \text{ M}$  sodium borate buffer solution (pH 9.3) under  $100\text{mW/cm}^2$  irradiation. The measured EIS spectra were fitted by Zview software using the proposed equivalent circuit model. The incident photon-to-current conversion efficiency (IPCE) of as-prepared films was measured at  $1.23 \text{ V}$  vs. RHE in  $0.5 \text{ M}$  sodium borate buffer solution (pH 9.3) under irradiation of monochromatic light. Incident light power was

measured using a THORLABS PM100D S120VC photodetector. The IPCE at each wavelength was calculated by the following equation:

$$\text{IPCE (\%)} = \frac{1240 \times (J_{\text{light}} - J_{\text{dark}})}{\lambda \times P_{\text{light}}} \times 100\%$$

Where J is the photocurrent density (mA/cm<sup>2</sup>), P<sub>light</sub> is the incident light power density (mW/cm<sup>2</sup>), and λ is the wavelength (nm) of the incident light.

The applied bias photon-to-current efficiency (ABPE) was calculated by the following equation:

$$\text{ABPE (\%)} = \frac{(J_{\text{light}} - J_{\text{dark}}) \times (1.23 - V_{\text{bias}})}{P_{\text{light}}} \times 100\%$$

where J is the photocurrent density, V<sub>bias</sub> is the applied potential, P<sub>light</sub> is the incident light power density (mW/cm<sup>2</sup>).

The donor densities and flat band potential of BiVO<sub>4</sub> and Co-doped BiVO<sub>4</sub> films were investigated using the Mott-Schottky measurement at a frequency of 1 kHz in dark. The donor densities was determined using the following equation:

$$\frac{1}{C^2} = \frac{2}{e\epsilon\epsilon_0 N_d} \left[ (V - V_f) - \frac{KT}{e} \right]$$

$$N_d = \frac{2}{e\epsilon\epsilon_0} \left[ \frac{d\left(\frac{1}{C^2}\right)}{dV} \right]^{-1}$$

where C is the differential capacitance of the space-charge region, ε is the relative

dielectric constant of sample,  $\epsilon_0$  is the permittivity of vacuum, A is the surface area of sample,  $N_d$  is the concentration of charge carriers, V is the applied potential,  $V_f$  is the flat band potential, K is Boltzmann constant, T is temperature and e is the elemental charge.

The surface charge separation sufficiency ( $\eta_{\text{surface}}$ ) was calculated using the equation:

$$\eta_{\text{surface}(100\%)} = \frac{J_{\text{water}}}{J_{\text{sulfite}}} \times 100\%$$

Calculations on the formation energies ( $E_f$ ) of oxygen vacancy and the energy of adsorption of  $\text{H}_2\text{O}$  molecule

The formation energies of oxygen vacancy in  $\text{BiVO}_4$  and  $\text{Co-BiVO}_4$  (200) have been studied by means of periodic density functional calculations were conducted using the “Vienna *ab initio* simulation package” (VASP 5.4.1), applying the generalized gradient correlation functional, which were calculated as:

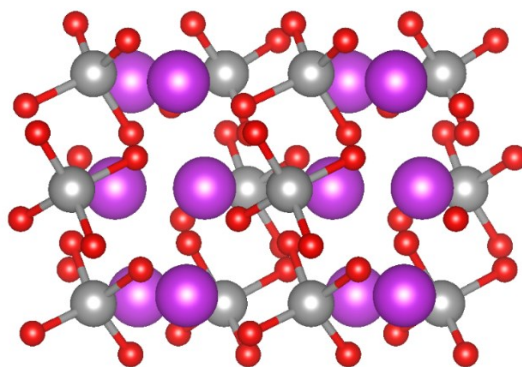

The total energy of  $\text{BiVO}_4$  structure :

$$E_{\text{per}} = -0.53425014\text{E}+03 = -534.25 \text{ eV}$$

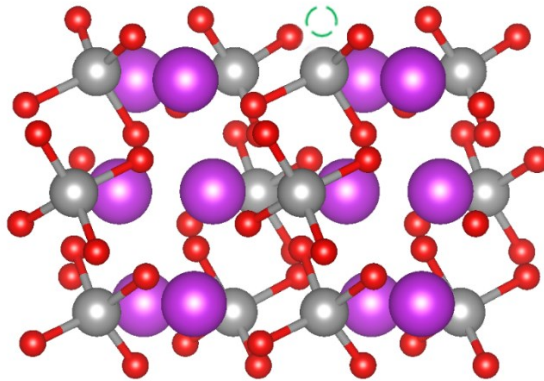

The energy of  $\text{BiVO}_4$  with oxygen vacancy :

$$E_{\text{tot}} = -0.52648191\text{E}+03 = -526.48 \text{ eV}$$

The energy of the O atom:

$$E_{\text{O}} = \frac{1}{2} \times (-8.84 \text{ eV}) = -4.42 \text{ eV}$$

The formation energy of oxygen vacancy:

$$\begin{aligned} E_{\text{f}} &= E_{\text{tot}} - E_{\text{per}} + E_{\text{O}} = -526.48 \text{ eV} - (-534.25 \text{ eV}) + \frac{1}{2} \times (-8.84 \text{ eV}) \\ &= 3.35 \text{ eV} \end{aligned}$$

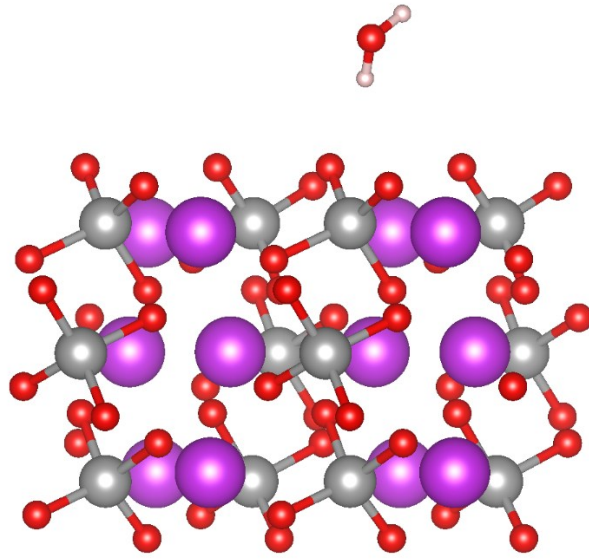

The energy of H<sub>2</sub>O molecule :

$$E_{\text{H}_2\text{O}} = -0.14224670\text{E}+02 = -14.22 \text{ eV}$$

The total energy of BiVO<sub>4</sub> after adsorption of H<sub>2</sub>O molecule :

$$E_{\text{tot}} = -0.54875740\text{E}+03 = -548.75 \text{ eV}$$

The energy of adsorption of H<sub>2</sub>O molecule onto the BiVO<sub>4</sub> structure :

$$E_{\text{ads}} = -548.75 \text{ eV} - (-534.25 \text{ eV} - 14.22 \text{ eV}) = -0.28 \text{ eV}$$

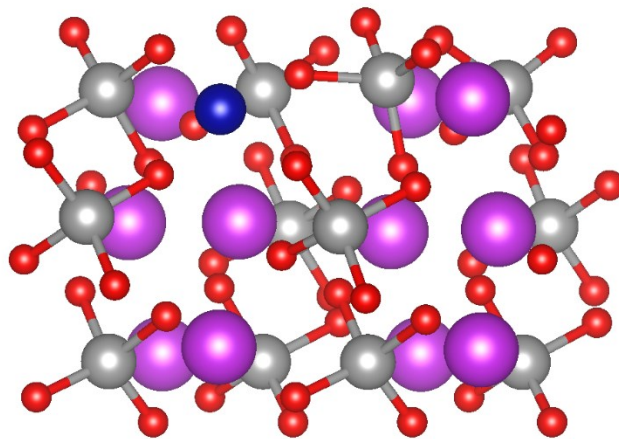



The energy of Co-doped BiVO<sub>4</sub> :

$$E_{\text{per}} = -0.53398119\text{E}+03 = -533.98 \text{ eV}$$

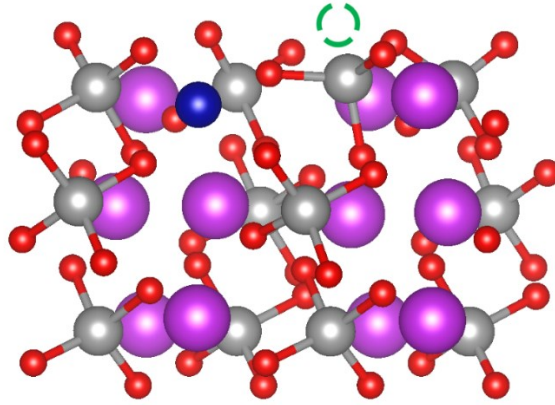

The energy of Co-doped BiVO<sub>4</sub> with oxygen vacancy :

$$E_{\text{tot}} = -0.52816242\text{E}+03 = -528.16 \text{ eV}$$

The formation energy of oxygen vacancy :

$$E_f = E_{\text{tot}} - E_{\text{per}} + E_o = -528.16 \text{ eV} - (-533.98 \text{ eV}) + \frac{1}{2} \times (-8.84 \text{ eV})$$
$$= 1.4 \text{ eV}$$

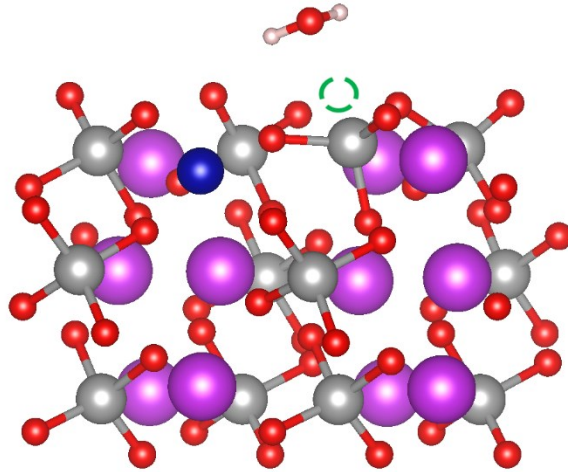

The energy of H<sub>2</sub>O molecule :

$$E_{\text{H}_2\text{O}} = -0.14224670\text{E}+02 = -14.22 \text{ eV}$$

The total energy of Co-doped BiVO<sub>4</sub> with oxygen vacancy after adsorption of H<sub>2</sub>O molecule :

$$E_{\text{tot}} = -0.54281575\text{E}+03 = -542.81 \text{ eV}$$

The energy of adsorption of H<sub>2</sub>O molecule onto the Co-doped BiVO<sub>4</sub> with oxygen vacancy structure :

$$E_{\text{ads}} = -542.81 \text{ eV} - (-528.16 \text{ eV} - 14.22 \text{ eV}) = -0.43 \text{ eV}$$

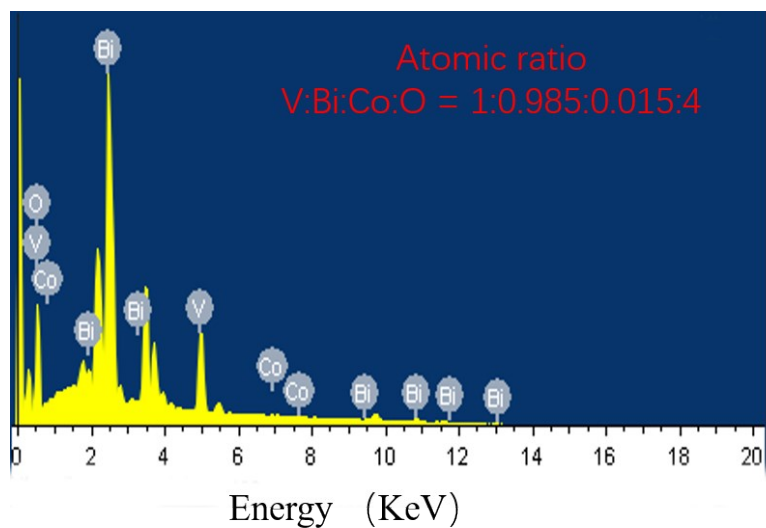

**Figure S1.** EDS data of 10Co-BiVO<sub>4</sub> photoanode.

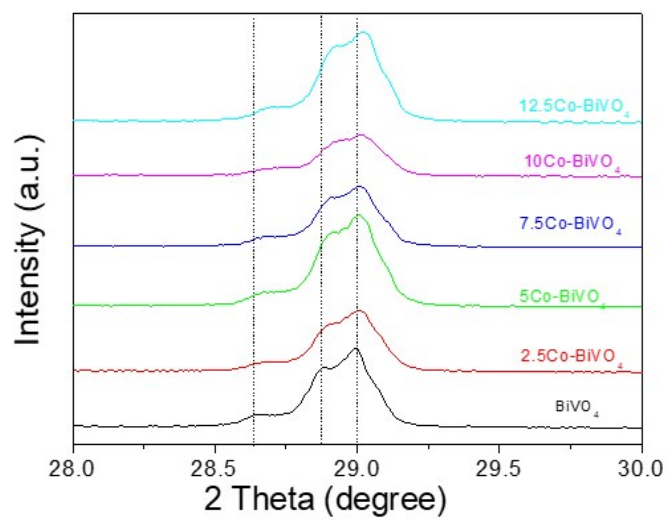

**Figure S2.** The magnified analysis of the XRD pattern of different Co-doped BiVO<sub>4</sub> photoanodes.

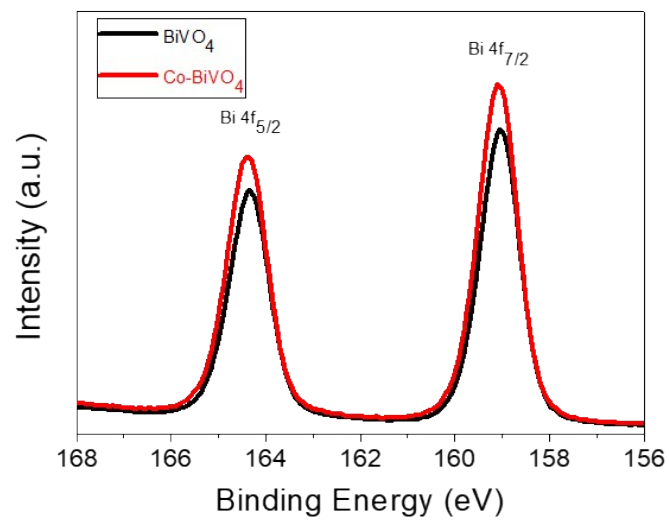

**Figure S3.** High-resolution XPS spectra of Bi 4f for pure BiVO<sub>4</sub> and Co-BiVO<sub>4</sub> electrode.

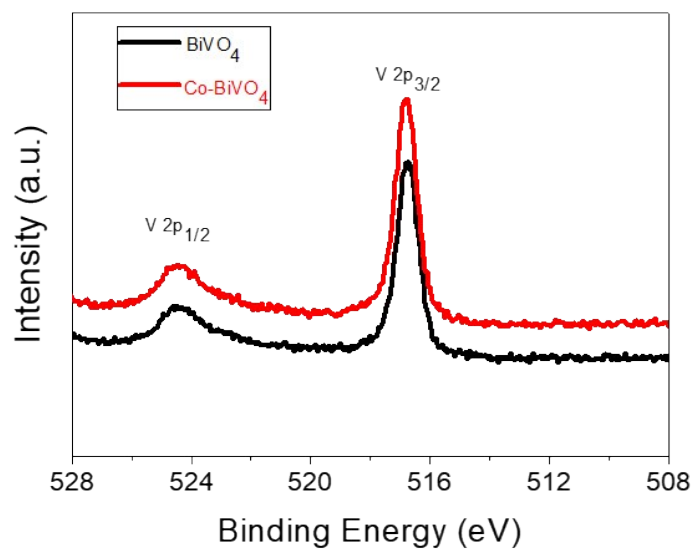

**Figure S4.** High-resolution XPS spectra of V 2p for pure BiVO<sub>4</sub> and Co-BiVO<sub>4</sub> electrode.

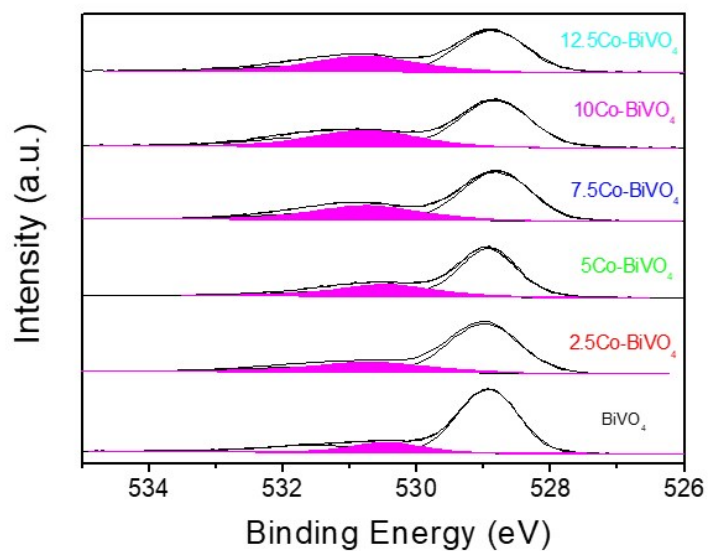

**Figure S5.** High-resolution XPS spectra of O 2p for pure BiVO<sub>4</sub> and Co-doped BiVO<sub>4</sub> photoanodes varied with the cobalt concentration.

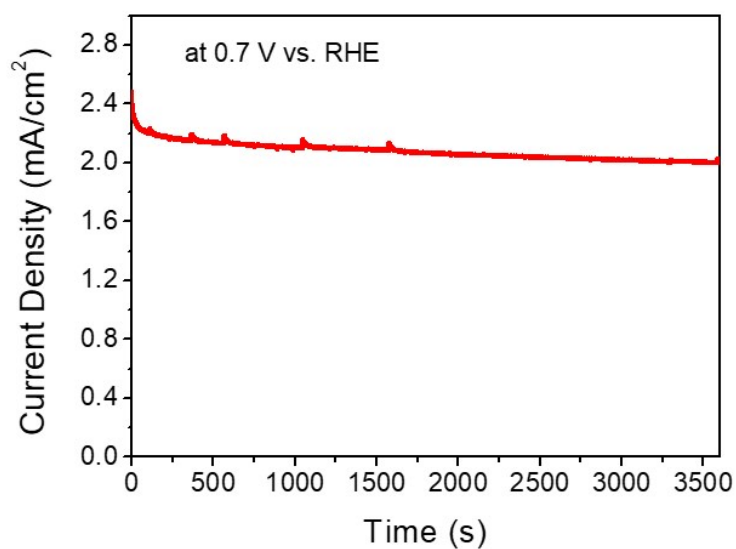

**Figure S6.** Photocurrent density as a function of time course for BiVO<sub>4</sub> and Co-BiVO<sub>4</sub> at 0.7 V versus RHE under AM 1.5 G illumination.

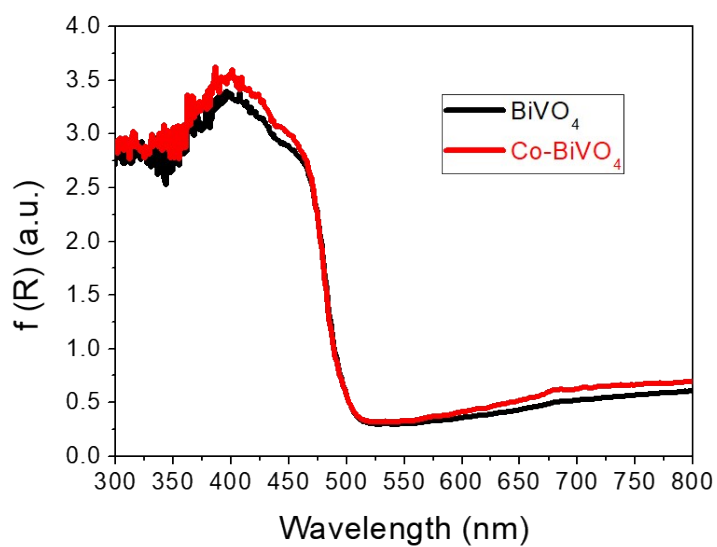

**Figure S7.** UV-vis absorption spectra of BiVO<sub>4</sub> and Co-BiVO<sub>4</sub> photoanodes.

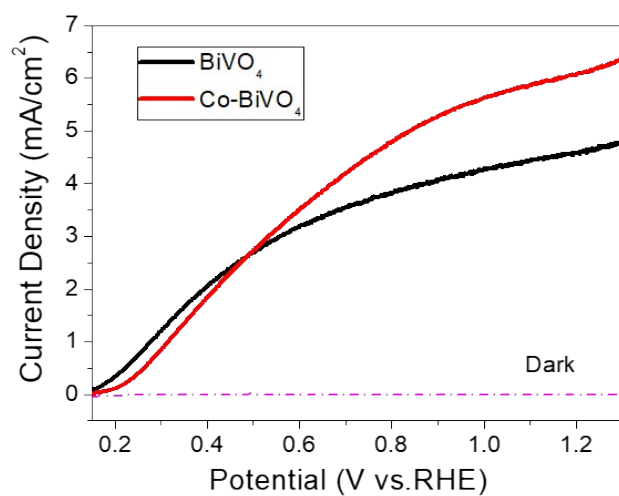

**Figure S8.** Photocurrent density versus applied potential curves. The PEC performances were measured in a 0.5 M sodium borate electrolyte in the presence of 0.2 M Na<sub>2</sub>SO<sub>3</sub> (pH 9.3).

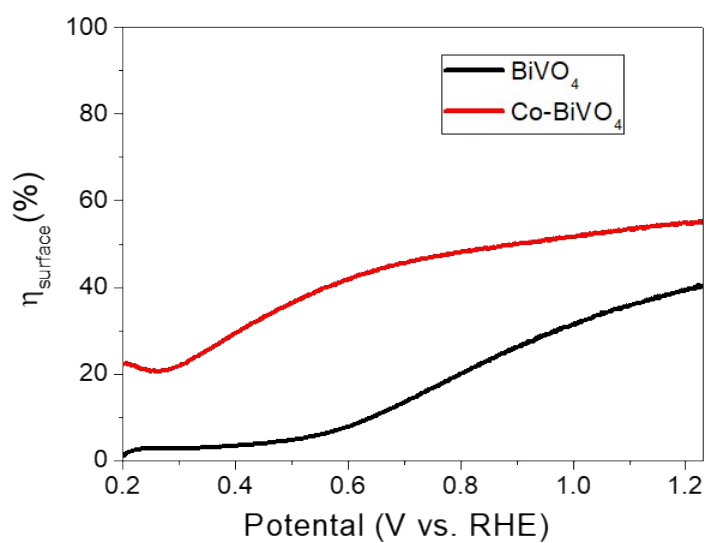

**Figure S9.** The surface charge separation efficiency of BiVO<sub>4</sub> and Co-BiVO<sub>4</sub>.

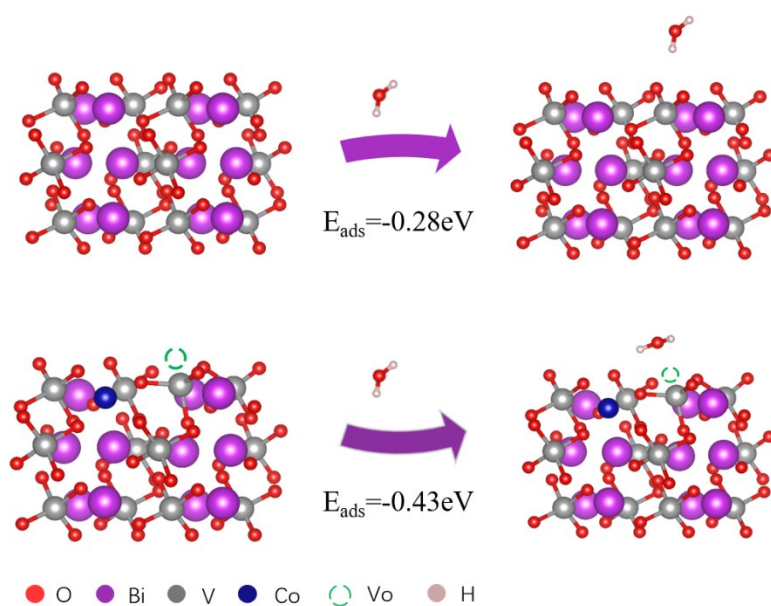

**Figure S10.** Schematic illustration of the adsorption of water molecular onto the surface of BiVO<sub>4</sub> and Co-BiVO<sub>4</sub> with rich oxygen vacancies.

**Table S1.** Comparison of the performance of doped-BiVO<sub>4</sub> photoelectrodes under simulated sunlight.

| Year | Photoanode                 | Fabrication method       | <sup>a</sup> Electrolyte (pH)         | <sup>b</sup> Photocurrent density (1.23 V vs. RHE) | Reference.       |
|------|----------------------------|--------------------------|---------------------------------------|----------------------------------------------------|------------------|
| 2016 | Fe/W-BiVO <sub>4</sub>     | drop-casting             | 0.1M Na <sub>2</sub> SO <sub>4</sub>  | 1.50 mA/cm <sup>2</sup>                            | 2                |
| 2018 | In-BiVO <sub>4</sub>       | drop-casting             | 0.1 M Na <sub>2</sub> SO <sub>4</sub> | 1.56 mA/cm <sup>2</sup>                            | 3                |
| 2018 | Mo-BiVO <sub>4</sub>       | dropping                 | 0.5 M KBi (8.5)                       | 2.89±0.05 mA/cm <sup>2</sup>                       | 4                |
| 2018 | Zr-BiVO <sub>4</sub>       | electrodeposition        | 0.1 M PBS (7.5)                       | 0.32 mA/cm <sup>2</sup>                            | 5                |
| 2019 | Zn-BiVO <sub>4</sub>       | electrodeposition        | 0.1 M KPi (7.0)                       | 3.06mA/cm <sup>2</sup>                             | 6                |
| 2018 | Mo-BiVO <sub>4</sub>       | pulsed laser deposition  | 0.5 M KPi (7.0)                       | 1.70 mA/cm <sup>2</sup>                            | 7                |
|      | Zn-BiVO <sub>4</sub>       |                          |                                       | 1.07 mA/cm <sup>2</sup>                            |                  |
| 2018 | Cu-BiVO <sub>4</sub>       | drop-casting             | 0.1 M KBi (8.5)                       | 0.94 mA/cm <sup>2</sup>                            | 8                |
|      | Ni-BiVO <sub>4</sub>       |                          |                                       | 0.82 mA/cm <sup>2</sup>                            |                  |
|      | Co-BiVO <sub>4</sub>       |                          |                                       | 1.01 mA/cm <sup>2</sup>                            |                  |
|      | <b>Co-BiVO<sub>4</sub></b> | <b>electrodeposition</b> | <b>0.5 M NaBi (9.3)</b>               | <b>3.50 mA/cm<sup>2</sup></b>                      | <b>This work</b> |

a. KPi: potassium phosphate, KBi: potassium borate, NaBi: sodium borate.

b. The light source of all results (AM 1.5G, 100 mW/cm<sup>2</sup>).



**Table S2.** The carrier densities ( $N_d$ ) of  $\text{BiVO}_4$  and  $\text{Co-BiVO}_4$ .

|                    | $N_d/10^{18} \text{ cm}^{-3}$ |
|--------------------|-------------------------------|
| $\text{BiVO}_4$    | 1.7014                        |
| $\text{Co-BiVO}_4$ | 3.3232                        |

## References

1. Y. Wang, F. Li, X. Zhou, F. Yu, J. Du, L. Bai and L. Sun, *Angew. Chem., Int. Ed.*, 2017, **56**, 6911-6915.
2. Z. Jiao, J. Zheng, C. Feng, Z. Wang, X. Wang, G. Lu and Y. Bi, *ChemSusChem*, 2016, **9**, 2824-2831.
3. X. Zhong, H. He, M. Yang, G. Ke, Z.-Y. Zhao, F. Dong, B. Wang, Y. Chen, X. Shi and Y. Zhou, *J. Mater. Chem. A*, 2018, **6**, 10456-10465.
4. Y. Shi, Y. Yu, Y. Yu, Y. Huang, B. Zhao and B. Zhang, *ACS Energy. Lett.*, 2018, **3**, 1648-1654.
5. M. N. Shaddad, P. Arunachalam, J. Labis, M. Hezam and A. M. Al-Mayouf, *Applied. Catalysis., B*, 2019, **244**, 863-870.
6. Q. G. Pan, K. R. Yang, G. L. Wang, D. D. Li, J. Sun, B. Yang, Z. Q. Zou, W. B. Hu, K. Wen and H. Yang, *Chem. Eng. J.*, 2019, **372**, 399-407.
7. M. Huang, J. Bian, W. Xiong, C. Huang and R. Zhang, *Journal of Materials Chemistry A*, 2018, **6**, 3602-3609.
8. H. Lu, V. Andrei, K. J. Jenkinson, A. Regoutz, N. Li, C. E. Creissen, A. E. H. Wheatley, H. Hao, E. Reisner, D. S. Wright and S. D. Pike, *Adv. Mater.* 2018, **30**, 1804033.
